# Supplementary material for: Inoculated Seed Endophytes Modify the Poplar Responses to Trace Elements in Polluted Soil
Source: MDPI journal article supplement (doi:10.3390/agronomy11101987), 2021-09-30
Supplement: s1 [file s1]

# Supplementary materials

## **Inoculated Seed Endophytes Modify the Poplar Responses to Trace Elements in Polluted Soil**

Francesca Vannucchi<sup>1</sup>, Valeria Imperato<sup>2</sup>, Anabel Saran<sup>2,3</sup>, Svetoslav Staykov<sup>2</sup>, Jan D'Haen<sup>4,5</sup>, Luca Sebastiani<sup>1</sup>, Jaco Vangronsveld<sup>4,6</sup>, Sofie Thijs<sup>2\*</sup>

<sup>1</sup>Institute of Life Science, Scuola Superiore Sant'Anna, Piazza Martiri della Libertà 33, 56127 Pisa, Italy; francesca.vn85@gmail.com (F.V.); luca.sebastiani@santannapisa.it (L.S)

<sup>2</sup>Environmental Biology, Centre for Environmental Sciences, Hasselt University, 3590 Diepenbeek, Belgium; vale.imperato@gmail.com (V.I.); saran.anabel@gmail.com (A.S); sofie.thijs@uhasselt.be (S.T)

<sup>3</sup>Experimental Agropecuary Estation INTA Anguil -CONICET ,6300 Anguil, La Pampa, Argentina

<sup>4</sup>Hasselt University, Institute for Material Research (IMO), Wetenschapspark 1, 3590 Diepenbeek, Belgium; jan.dhaen@uhasselt.be (J. D.); jaco.vangronsveld@uhasselt.be (J. V)

<sup>5</sup>IMEC, Division IMOMECE, Wetenschapspark 1, 3590 Diepenbeek, Belgium

<sup>6</sup>Department of Plant Physiology and Biophysics, Institute of Biological Sciences, Faculty of Biology and Biotechnology, Maria Curie-Skłodowska University, Lublin, Poland

\* Correspondence: sofie.thijs@uhasselt.be

**Figure S1.** SEM image of *Methylobacterium sp.* CP3 culture and relative EDX spectra of three selected zones (1,2 and 3). Sample was taken after two days of growing in a 0.8 mM Cd containing medium. Acceleration voltage 12.5 kV and magnification 20.000 x. Spectrum of spot 1 is not reported as Cd was not detected.

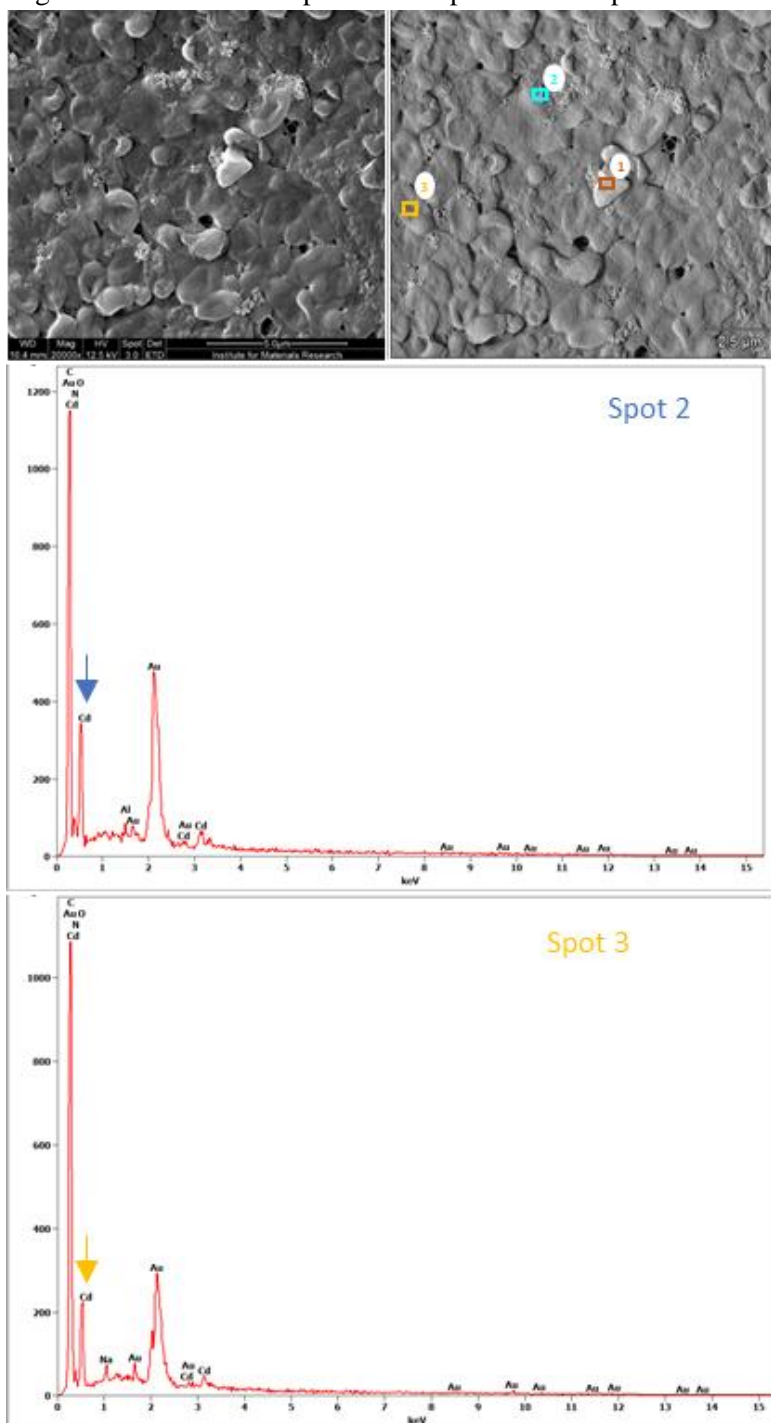

**Figure S2.** SEM image of *Methylobacterium* sp. CP3 culture and relative EDX spectra of three selected zones (1,2 and 3). Sample was taken after two days of growing in a 1 mM Zn containing medium. Acceleration voltage 12.5 kV and magnification 20.000 x.

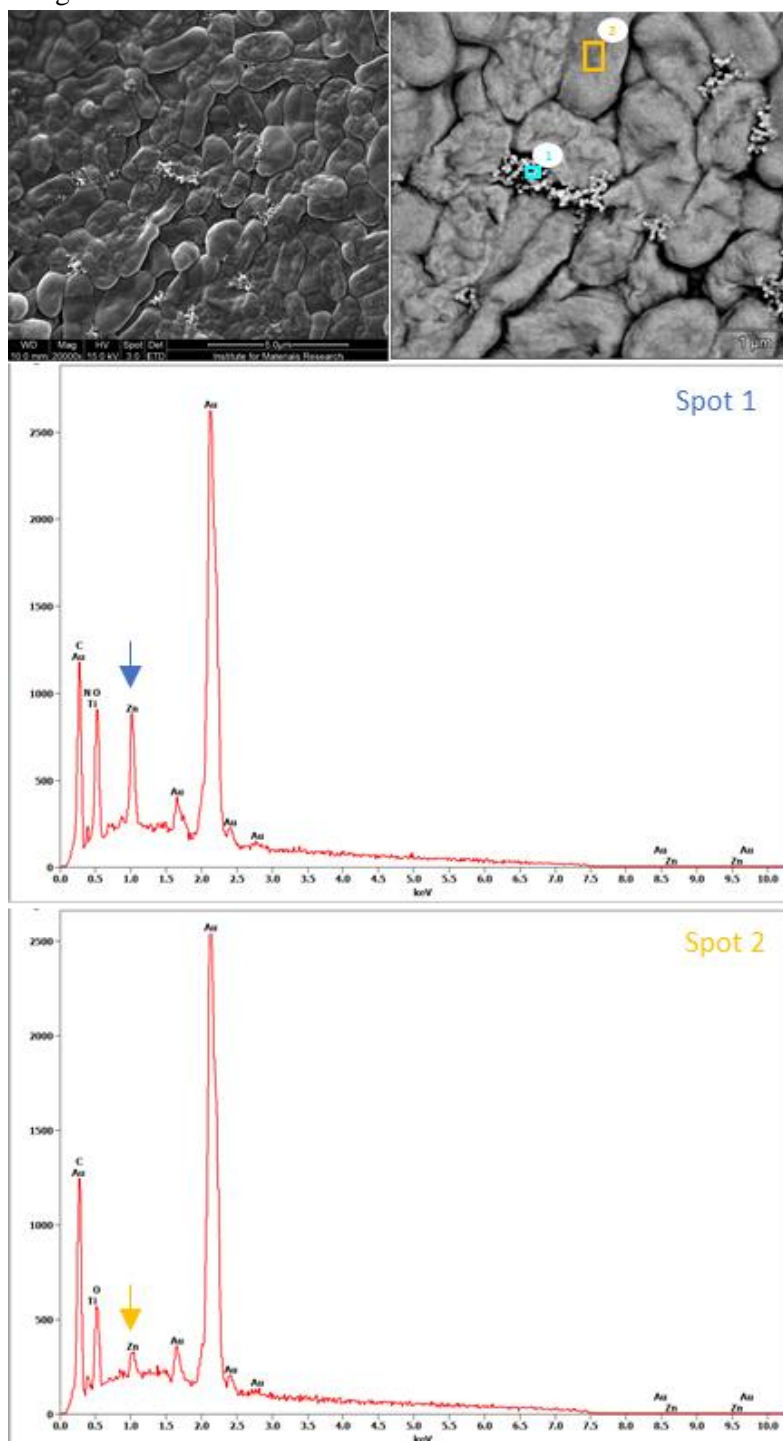

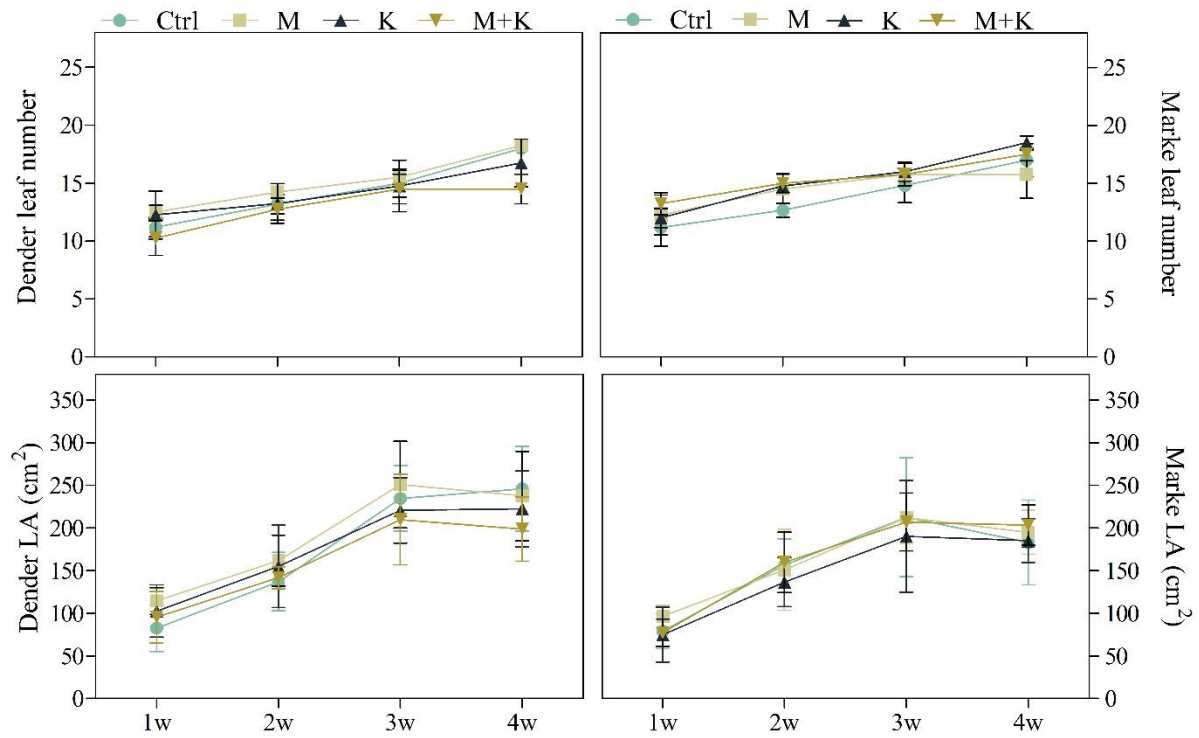

**Figure S3.** Number of leaves and leaf area (LA) in *Populus* ‘Dender and *Populus* ‘Marke’ cultivars detected during the 4-weeks inoculation experiment. Ctrl (control): non inoculated cuttings; M: *Methylobacterium* sp. CP3 inoculation; K: *Kineococcus endophyticus* CP19 inoculation; M+K: *Methylobacterium* sp. CP3 and *Kineococcus endophyticus* CP19 inoculation.

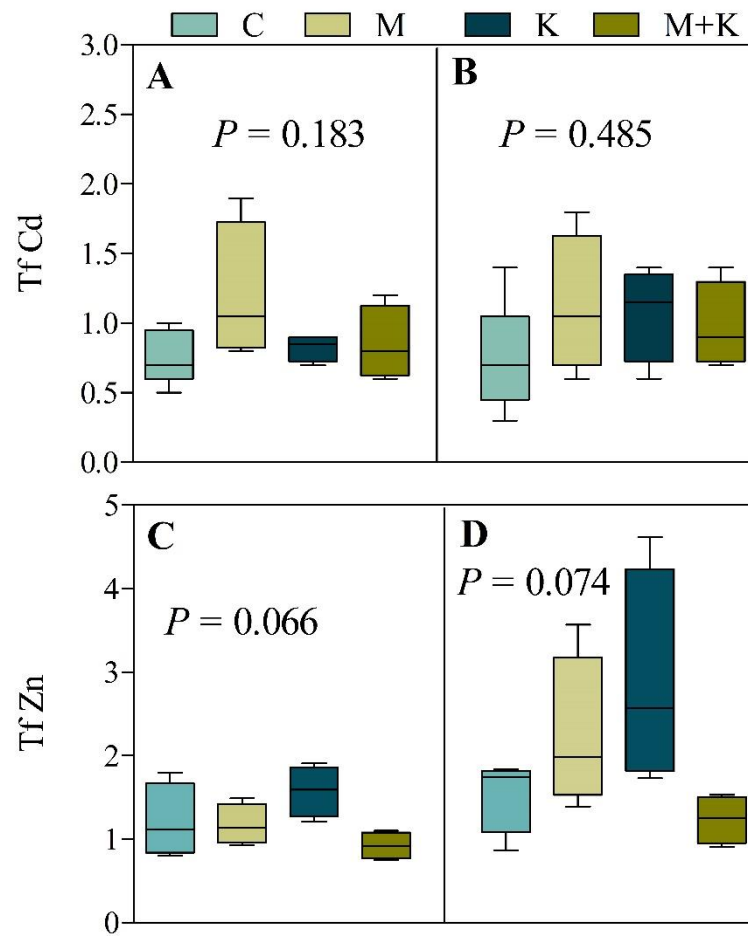

**Figure S4.** Translocation factors ( $T_f$ ) for Cd and Zn calculated for cuttings of the *Populus* cultivars 'Dender' (A, C) and 'Marke' (B, D) after 6 weeks of growth in trace elements polluted soil. Ctrl (control): non-inoculated cuttings; M: *Methylobacterium* sp. CP3 inoculation; K: *Kineococcus endophyticus* CP19 inoculation; M+K: *Methylobacterium* sp. CP3 and *Kineococcus endophyticus* CP19 inoculation. Statistical significance was determined with one-way ANOVA followed by Tukey's Multiple Comparison Test ( $P \leq 0.05$ ).

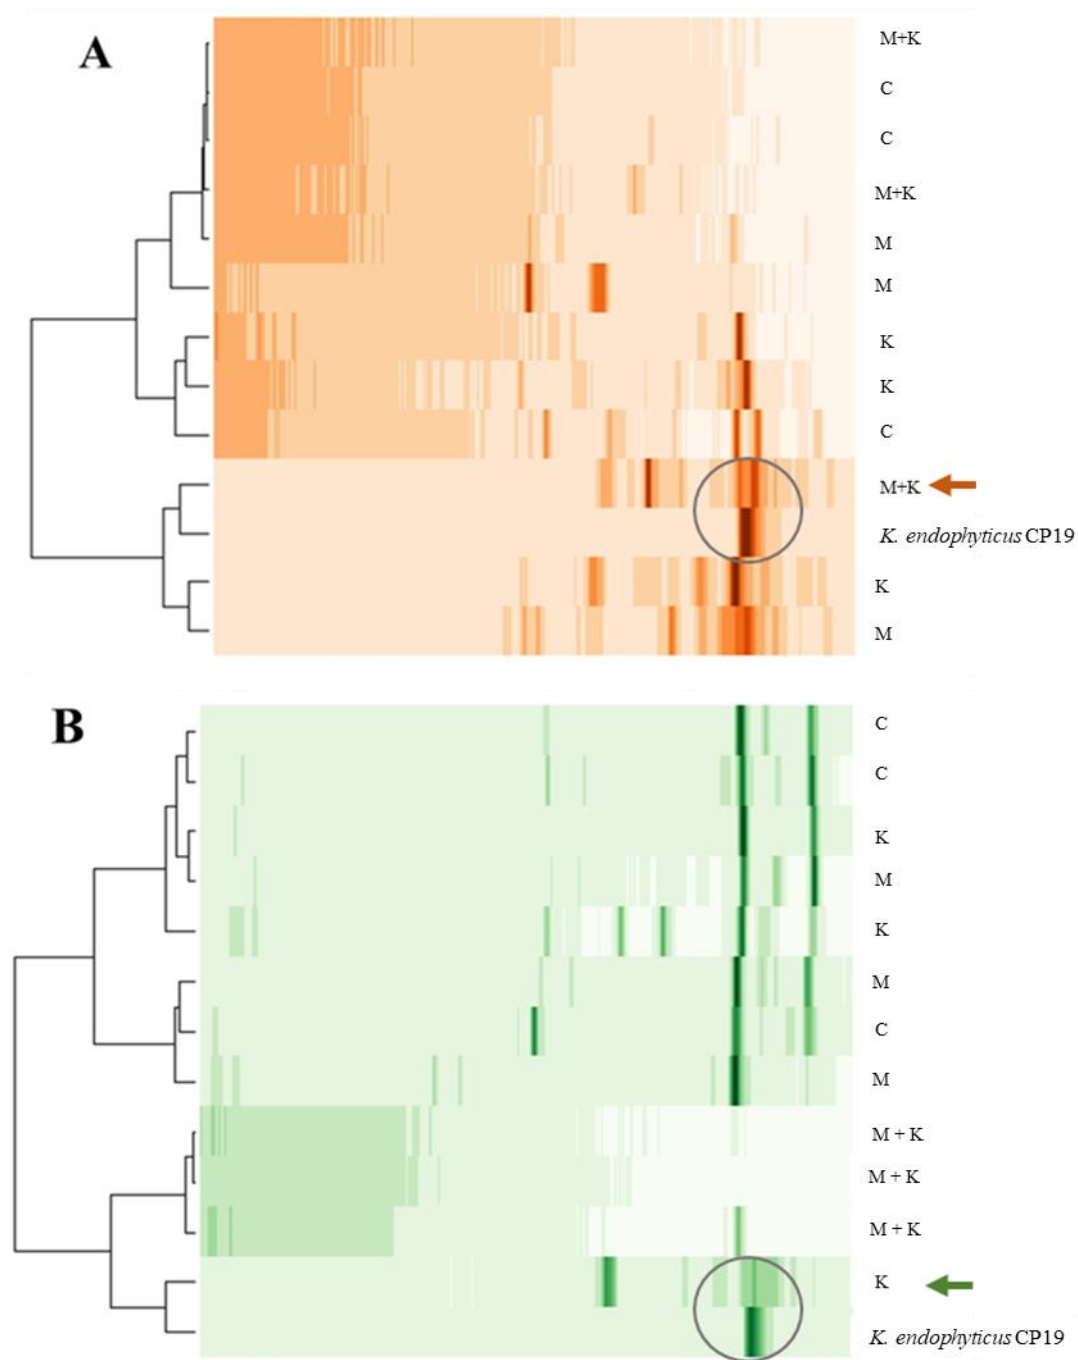

**Figure S5.** Heatmaps derived by ARISA analysis for *Populus* 'Marke' roots (A) and 'Dender leaves (B). C: non-inoculated cuttings; M: *Methylobacterium* sp. CP3 inoculation; K: *Kineococcus endophyticus* CP19 inoculation; MK: *Methylobacterium* sp. CP3 and *Kineococcus endophyticus* CP19 inoculation. Numbers refer to replicates. *K. endophyticus* CP19 = *Kineococcus endophyticus* pure line. A complete linkage algorithm was used to perform a Pearson correlation from ARISA values
