# Supplementary material for: Inoculated Seed Endophytes Modify the Poplar Responses to Trace Elements in Polluted Soil
Source: MDPI journal article supplement (doi:10.3390/agronomy11101987), 2021-09-30
Supplement: s1 [file s1]

Archive with 1 entries (1 files):
- agronomy-1380453-supplementary.pdf
